# Supplementary material
Source: PubMed Central journal article supplement (PMC5659991)
Supplement: BPH-174-4155-s003.pdf [file BPH-174-4155-s003.pdf]

## Supplementary Materials

### METHODS

#### RT-PCR

Total RNA was isolated from PASMIC with TRIzol reagent and quantitated by NanoDrop (Thermo Scientific). 1 mg of total RNA was used for reverse transcription with Taq Man Reverse Transcription Reagents (Applied Biosystems), and the emerging first-strand cDNA was used as a template for PCR reaction with High Fidelity Master Mix (New England Biolabs). PCR primers were designed using the NCBI Primer Blast and synthesized by Integrated DNA Technologies. The primer sequences for human TAS2R (hTAS2R), rat TAS2R (rTAS2R) and mouse TAS2R (mTAS2R) are shown in Supplemental Tables 2, 3 and 4. RT-PCR results were resolved using 2% agarose gels and ethidium bromide staining.

**Table S2.** DNA primer sequences for the hTAS2Rs

| Subtype | Forward (5'-3')        | Reverse (5'-3')       | Predicted amplicon size (bp) |
|---------|------------------------|-----------------------|------------------------------|
| Tas2r3  | TCCTCTGGCTCAAGTGGAGA   | TAAGGGAGGCAGGTACCACA  | 224                          |
| Tas2r4  | GAATCCCCAGACGGAAGCTC   | CCTGGAGAGTAAAGGGTGGC  | 171                          |
| Tas2r7  | CCCTGCGGAGACATATCAGG   | ACAGCTTTCAGGGCTCTCAC  | 91                           |
| Tas2r10 | CCACAGCCATCTATCCCTGG   | TCAATTGCTGCAGTACCCTCA | 93                           |
| Tas2r14 | TGGGTGGTGTCAATAAAGAGCA | ACACACACCAGCTTCCGAAT  | 204                          |
| Tas2r39 | TGTGGTCGGTCTGGCTTTTT   | CTTTGATGGCCCCATGTGA   | 173                          |
| Tas2r40 | CCCACTGGTGACCGCATTAT   | GGCAGCAAACCAGAGATTGG  | 180                          |

**Table S3.** DNA primer sequences for the mTAS2Rs

| Subtype  | Forward (5'-3')        | Reverse (5'-3')       | Predicted amplicon size (bp) |
|----------|------------------------|-----------------------|------------------------------|
| Tas2r137 | GCGCACTGCTCTTATCCTGT   | CAGCAGAAGGTAGGCAACCA  | 203                          |
| Tas2r108 | ATTTGTGTTTGCTGCCTCGG   | ATCCGGAGAGGCAATTCTGC  | 115                          |
| Tas2r130 | AGAACTCTACTGGCATGTGTGA | AGGGGAACAGCATGACCAAG  | 187                          |
| Tas2r110 | AGCCTTGCAAACAGGGTTCT   | GGCACCTCAGACAATGCAAC  | 221                          |
| Tas2r114 | CCCAGTTGTTGCGAAGATGG   | TTCCATCTGCCTGCGATGTC  | 196                          |
| Tas2r139 | TAATGCCCTGGCTTCTGTGG   | AGGAGGGAGTATTCCTGAAA  | 194                          |
| Tas2r140 | CCAGCACACAGCCCATATTA   | TGGACTTCAGCCACCATACTG | 243                          |

**Table S4.** DNA primer sequences for the rTAS2Rs

| <b>Subtype</b> | <b>Forward (5'-3')</b>   | <b>Reverse (5'-3')</b> | <b>Predicted amplicon size (bp)</b> |
|----------------|--------------------------|------------------------|-------------------------------------|
| Tas2r137       | ATGTTGGGATTCACTGAAGGGATA | TGAGTCGTGGGTGTGGTAAG   | 234                                 |
| Tas2r108       | CGCTGCCTTGCTCTATTTCC     | ATGTCCTGGAGGGTAAGCAG   | 94                                  |
| Tas2r121       | CAGAGGGGAACGAGACCCTA     | ACCAGACAACCTGGAATGCCT  | 237                                 |
| Tas2r107       | TACTGGGGAAACACGTCTTGG    | CTCATGGCTTTCACATGAGC   | 212                                 |
| Tas2r123       | CACCATGGCCACACAAAAG      | TTTGGACCGGCACCTAAGAC   | 247                                 |
| Tas2r139       | AACGGTGATGCTGACTCCAG     | ACCGGCAGACTGATTCTGAG   | 176                                 |
| Tas2r144       | GCAGCTTTATCCTGACCGCC     | GGTAAAGTCGAACGTGGTGC   | 111                                 |

### **Transfection of HEK293**

Twenty-four hours after plating, HEK293 cells at 60-80% confluency were transiently transfected with GFP, or TRPC6 expression plasmids using Lipofectamine 2000 transfection reagent, based on the manufacturer's protocol. Transfection was performed at 37°C in serum-free Opti-MEM medium (Gibco) with 0.5 µg/ml DNA and Transfection reagent (µl). After 4-6 hrs of incubation at 37°C with transfection media, the medium was changed to serum containing DMEM.  $[Ca^{2+}]_{cyt}$  measurement was performed 48-72 hrs after the transient transfection. The cDNA vector used for transfecting the TRPC6 gene is pCMS-EGFP-rat-TRPC6 (8,481bp).

## RESULTS

**Table S1.** The gene synonym between human, rat and mouse TAS2Rs

| Human synonym | Rat synonym | Mouse synonym |
|---------------|-------------|---------------|
| Tas2r3        | Tas2r137    | Tas2r137      |
| Tas2r4        | Tas2r108    | Tas2r108      |
| Tas2r7        | Tas2r121    | Tas2r130      |
| Tas2r10       | Tas2r107    | Tas2r110      |
| Tas2r14       | Tas2r123    | Tas2r114      |
| Tas2r39       | Tas2r139    | Tas2r139      |
| Tas2r40       | Tas2r144    | Tas2r140      |

**Table S5.** Chloroquine inhibits the development of hypoxia-induced pulmonary hypertension in rats

|                       | Normoxia   | Normoxia+CHQ | Hypoxia     | Hypoxia+CHQ |
|-----------------------|------------|--------------|-------------|-------------|
| RVSP (mm Hg)          | 25.98±1.54 | 26.19±1.70   | 51.07±2.56* | 32.83±3.05# |
| RV/(LV+S) (g/g)       | 0.32±0.013 | 0.30±0.012   | 0.54±0.026* | 0.44±0.01#  |
| RV/BW (mg/g)          | 0.64±0.03  | 0.71±0.03    | 1.14±0.08*  | 0.86±0.04#  |
| HCT (%)               | 43.2±0.66  | 43.3±2.12    | 57.3±1.12*  | 50.9±0.86#  |
| PA wall thickness (%) | 24.8±1.25  | 23.6±1.15    | 52.8±2.90*  | 34.1±1.37*# |

CHQ, Chloroquine; RVSP, right ventricular systolic pressure; RV, right ventricle; BW, body weight; HCT, hematocrit; PA, pulmonary artery. Data are means±SE, \* $P$ <0.05 vs. Normoxia; # $P$ <0.05 vs. Hypoxia. n=6 in each group.

**Table S6.** Chloroquine inhibits the progression of established pulmonary hypertension in Sugen5416/hypoxia rats model.

|                 | Nor        | SuHx 3w                  | SuHx 3w+<br>NOR2w | SuHx 3w+<br>CHQ 2w       |
|-----------------|------------|--------------------------|-------------------|--------------------------|
| RVSP (mm Hg)    | 25.01±1.14 | 64.15±5.48* <sup>#</sup> | 101.86±2.62*      | 72.27±3.22* <sup>#</sup> |
| RV/(LV+S) (g/g) | 0.30±0.021 | 0.56±0.022* <sup>#</sup> | 0.72±0.047*       | 0.53±0.016* <sup>#</sup> |
| RV/BW (mg/g)    | 0.61±0.04  | 1.40±0.07* <sup>#</sup>  | 1.81±0.10*        | 1.26±0.03* <sup>#</sup>  |

CHQ, Chloroquine; SuHx, Sugen5416/hypoxia; Nor, Normoxia; RVSP, right ventricular systolic pressure; RV, right ventricle; BW, body weight. Data are means±SE, \**P*<0.05 vs. Nor; <sup>#</sup>*P*<0.05 vs. SuHx 3w+Nor 2W. n=6 in each group.

## Figure Legends

**Figure S1.** RT-PCR analysis of TAS2R in human PASMC (A), rat pulmonary arteries (B) and mouse pulmonary arteries. Transcripts of seven subtypes of hTAS2Rs (3, 4, 7, 10, 14, 39, 40) (A), rTAS2Rs (137, 108, 121, 107, 123, 139, 144) (B) and mTAS2Rs (137, 108, 130, 110, 114, 139, 140) (C) are identified in human PASMC, rat pulmonary arteries and mouse pulmonary arteries, respectively.

**Figure S2.** Chloroquine inhibits ATP-induced increase in  $[Ca^{2+}]_{cyt}$  in HEK293 cells transiently transfected with the TRPC6 gene. *A:* Representative traces showing changes of  $[Ca^{2+}]_{cyt}$  before and during extracellular application of ATP (100  $\mu$ M) in HEK293 cells transfected with an empty vector (GFP) and the TRPC6 gene (*Trpc6*) in the absence (GFP, *Trpc6*) or presence (*Trpc6*+CHQ) of 200  $\mu$ M chloroquine (CHQ). *B:* Summarized data (mean $\pm$ SE) showing  $[Ca^{2+}]_{cyt}$  before (Basal) and after (ATP) extracellular application of ATP in GFP- and *Trpc6*-transfected cells in the absence (GFP, *Trpc6*) or presence (*Trpc6*+CHQ) of chloroquine. \* $P$ <0.05 vs. Basal. *C:* Summarized data (mean $\pm$ SE) showing ATP-induced increases in  $[Ca^{2+}]_{cyt}$  in GFP-transfected cells and *Trpc6*-transfected cells treated with (*Trpc6*+CHQ) or without (*Trpc6*) chloroquine. \* $P$ <0.05 vs. Control; # $P$ <0.05 vs. *Trpc6*.
